# Supplementary material for: Fluorescence turn-on probe for homocysteine and cysteine in water
Source: Royal Society of Chemistry journal article supplement (doi:10.1039/b814581d), 2008-01-01
Supplement: b814581d.pdf [file b814581d.pdf]

## Supporting Information

### Fluorescence Turn-On Probe for Homocysteine and Cysteine in Water

Kyung-Sik Lee,<sup>a</sup> Tae-Ki Kim,<sup>b</sup> Jong-Ho Lee,<sup>c</sup> Hae-Jo Kim,<sup>\*,b</sup> and Jong-In Hong<sup>\*,a</sup>

<sup>\*</sup>To whom correspondence should be addressed.

E-mail: [jihong@snu.ac.kr](mailto:jihong@snu.ac.kr), [haejkim@kgu.ac.kr](mailto:haejkim@kgu.ac.kr)

### Experimental

**General Procedures.** <sup>1</sup>H and <sup>13</sup>C NMR spectra were recorded using an Advance 300MHz Bruker spectrometer in chloroform-*d*<sub>3</sub>, D<sub>2</sub>O. <sup>1</sup>H NMR chemical shifts are reported as parts per million (δ) and referenced to residual solvent peak (δ 4.80 for D<sub>2</sub>O and 7.28 for CDCl<sub>3</sub>). and <sup>13</sup>C NMR chemical shifts in CDCl<sub>3</sub> were reported relative to CHCl<sub>3</sub> (77.23 ppm). UV visible spectra were recorded on a Beckman DU 800 spectrophotometer. Fluorescence spectra were recorded on a Jasco FP-6500 spectrophotometer. Analytical thin-layer chromatography was performed using Kieselgel 60F-254 plates from Merck. Column chromatography was carried out on Merck silica gel 60 (70 - 230 mesh). All solvents and reagents were commercially available and used without further purification unless otherwise noted.

### Fluorescence titration experiment

Probe **1** was dissolved in DMSO to afford a concentration of 10 mM stock solution, which was diluted with distilled water up to 10 μM. Guests were dissolved in 10 μM host (**1**) solution and used for the fluorescence titration experiment. Fluorescence titration was performed with Jasco FP-6500 spectrofluorometer at rt.

### Human blood serum treatment

Venous blood specimens were collected in EDTA-treated tubes after a 12-hour fast. The tubes were immediately covered with aluminum foil and placed on ice until they arrived at the laboratory room (within 1-3 hours) for separating plasma. The tubes centrifuged at for 15minutes at 2-8 °C at 1,000×g. The separated plasmas were immediately stored at -70 °C until analysis.

**Fig S1.** <sup>1</sup>H NMR spectra of **1** after addition of Cys. (a) **1** only (b) **1** and 2 equiv. L-cysteine in D<sub>2</sub>O with HEPES buffer (pH=7.4). Peaks below 4.79 ppm are from those of HEPES.

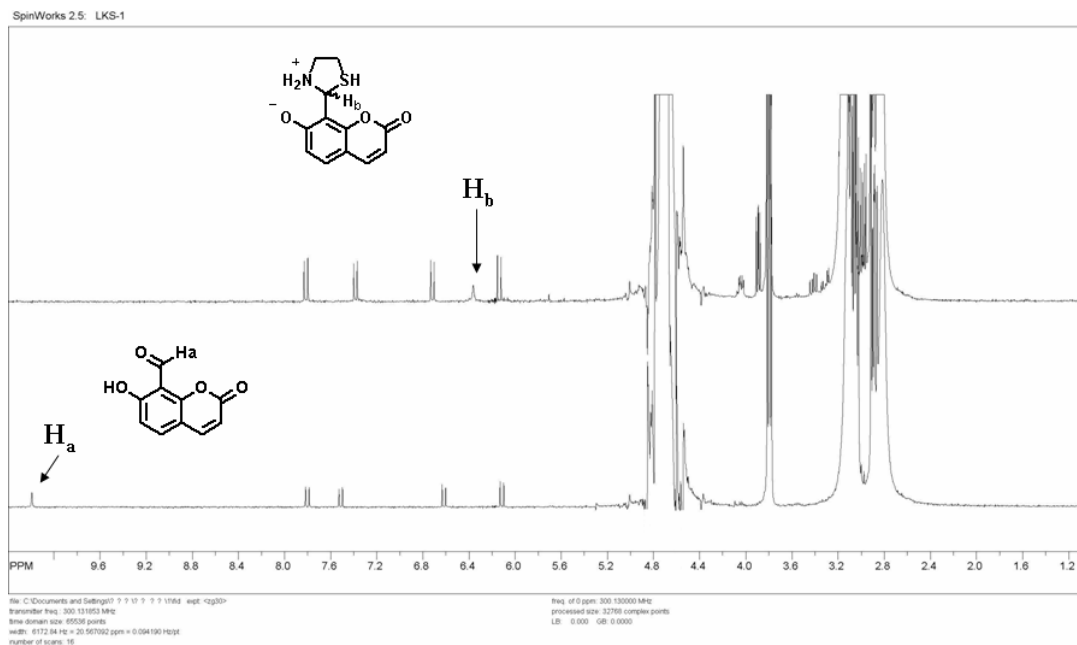

**Fig S2.**  $^1\text{H}$  NMR spectra of **1** after addition of Cys. (a) **1** only (b) **1** and 2 equiv. D/L-homocysteine in  $\text{D}_2\text{O}$  with HEPES buffer (pH=7.4). Peaks below 4.79 ppm are from those of HEPES.

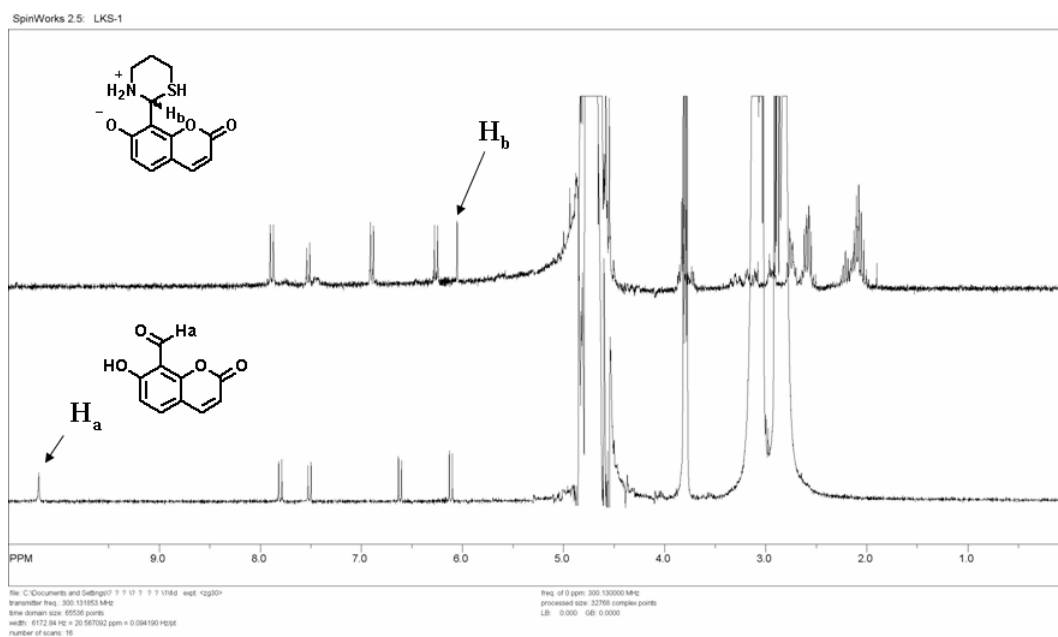

**Fig S3.** UV-vis absorbance and fluorescence spectra of probe **1**.

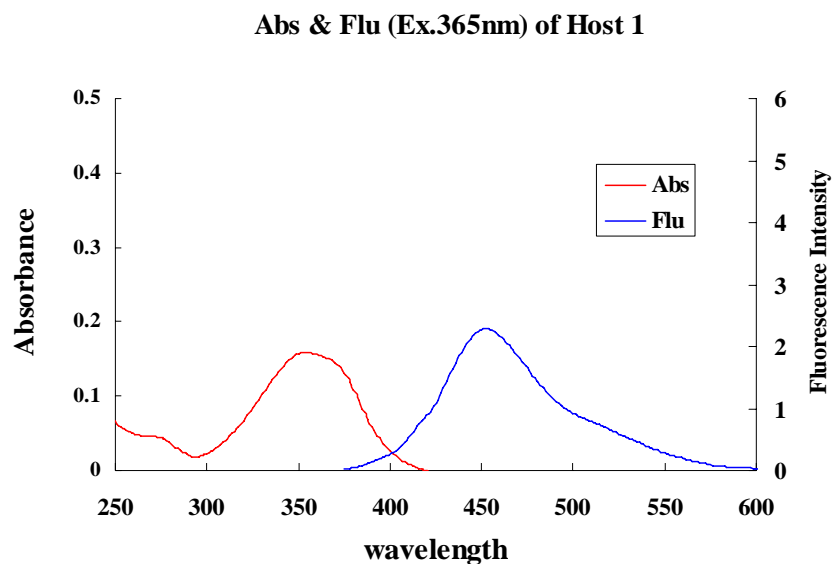

**Fig S4.** Fluorescence emission change of probe **1** vs D/L-homocysteine equiv at 500 nm.

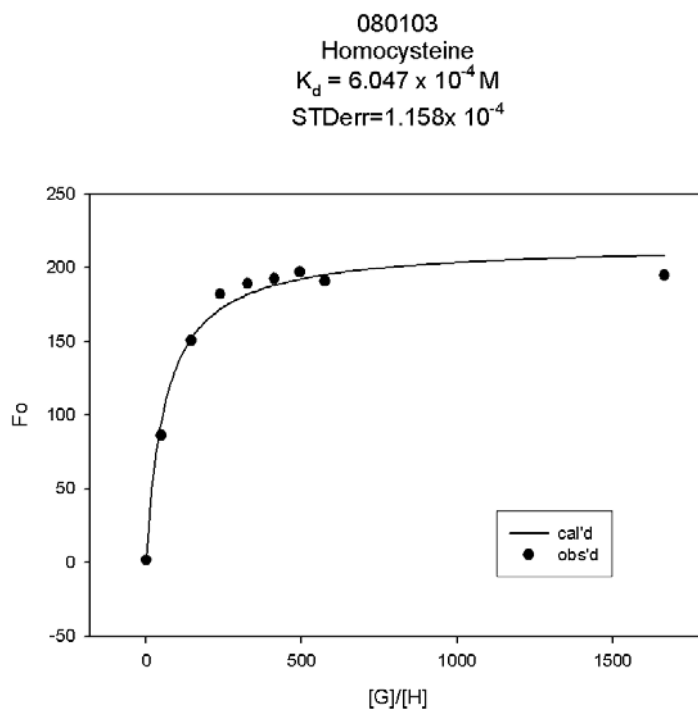

**Fig S5.** Fluorescence titration spectra of the probe **1** upon addition of L-cysteine. ( $[1] = 10 \mu\text{M}$ ,  $\lambda_{\text{ex}} = 365 \text{ nm}$ ,  $\lambda_{\text{em}} = 450 \text{ nm}$ )

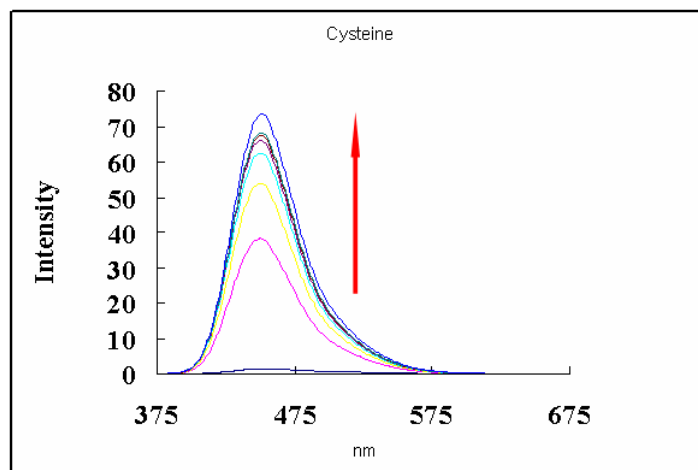

**Fig S6.** Fluorescence emission change of probe **1** vs L-cysteine equiv at 450 nm.

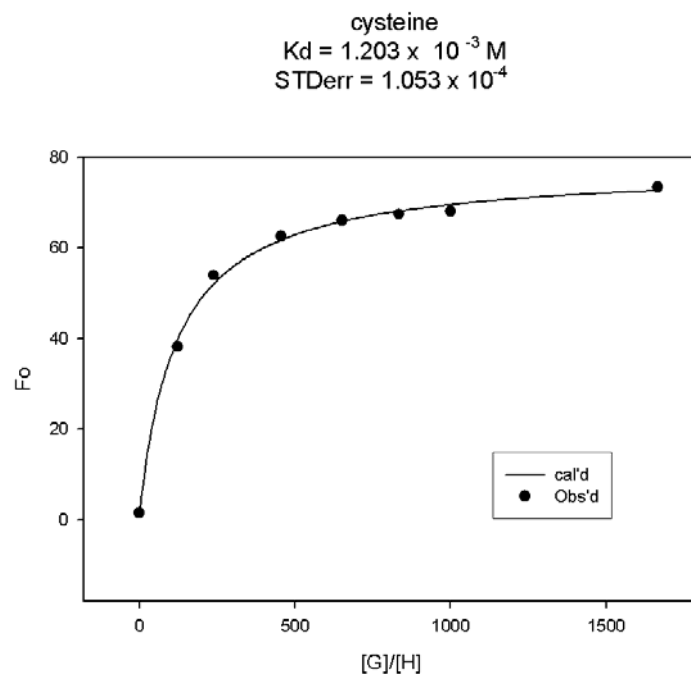

**Fig S7.** Homocysteine and cysteine selectivity of **1** in the presence of other amino acids and glutathione. [**1**] = 10  $\mu$ M, Hcy, Cys = 500 equiv in the presence of each amino acids and GSH (500 equiv). Light blue bar upon the addition of each analyte to **1** and brown bar upon the addition of Hcy to a solution of **1** and each analyte.

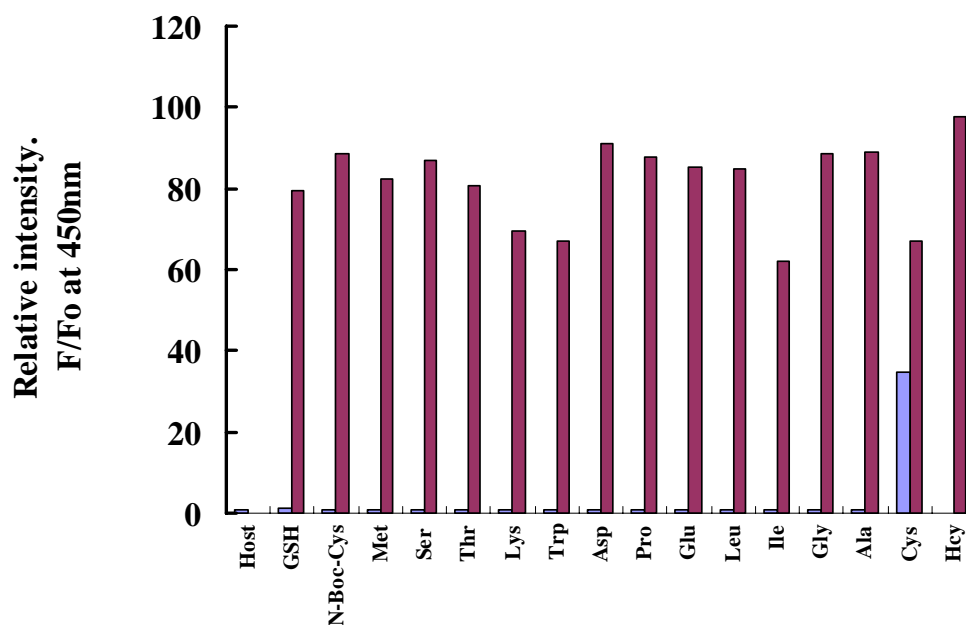

**Fig S8.** (a) Proposed **1**-Hcy binding mode, (b) its computational model structure.

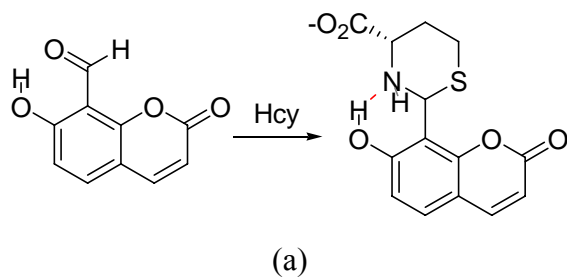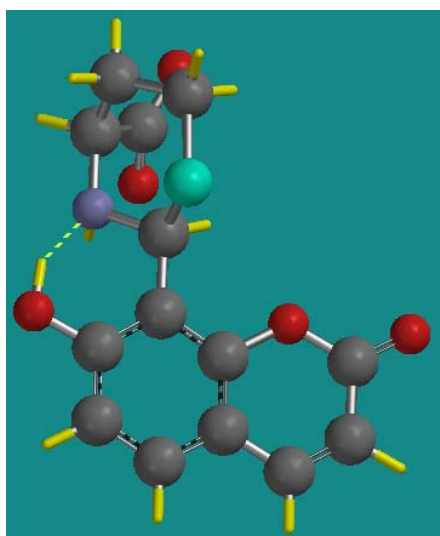

**Fig S9.** The HOMO and LUMO orbitals of probe **1** and its homocysteine adduct.  
DFT calculation results based on B3LYP 6-31G\* in Spartan 2004, Wavefunction Inc.

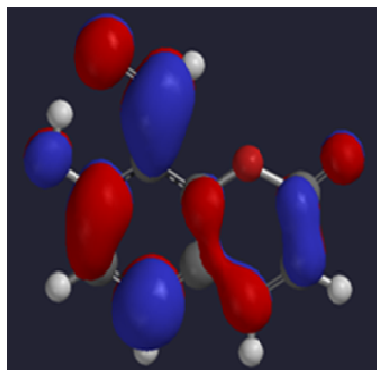

LUMO (-2.33 eV)

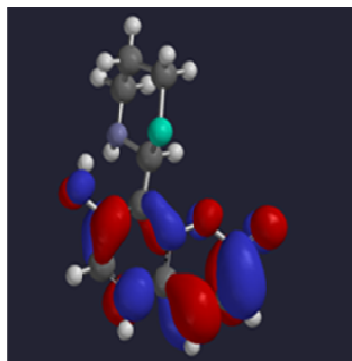

LUMO (-1.57 eV)

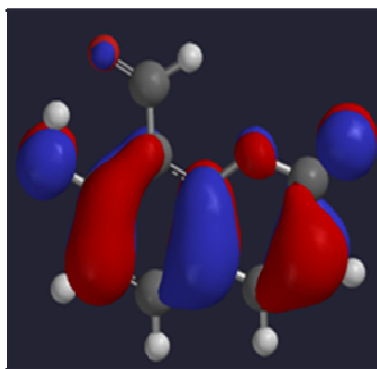

HOMO (-6.45 eV)

**1**

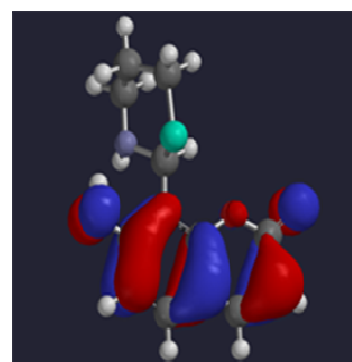

HOMO (-5.89 eV)

**1-Hcy**
